# Supplementary material for: A phenazine-imidazole based ratiometric fluorescent probe for Cd2+ ions and its application in in vivo imaging
Source: Royal Society of Chemistry journal article supplement (doi:10.1039/d1ay02176a), 2022-01-01
Supplement: d1ay02176a1.pdf [file d1ay02176a1.pdf]

## Supporting Information

### **Phenazine-imidazole based ratiometric fluorescent probe for Cd<sup>2+</sup> ion and its application in vivo imaging**

Jian Hua Wang <sup>a</sup>, Yao Ming Liu <sup>b</sup>, Jian Bin Chao <sup>b</sup>, Yu Wang <sup>a\*</sup>, Hui Wang <sup>c\*</sup>, Shaomin Shuang <sup>a\*</sup>

<sup>a</sup> School of Chemistry and Chemical Engineering, Shanxi University, Taiyuan 030006, PR China

<sup>b</sup> Scientific Instrument Center, Shanxi University, Taiyuan 030006, PR China

<sup>c</sup> College of Chemistry & Material Science, Shanxi Normal University, Linfen, 041004, PR China

### **Content**

#### **Bio-imaging procedure**

**Figure S1.** Effect of pH

**Figure S2.** Reversibility experiments

**Figure S3.** Job's plot and Benesi-Hildebrand plot

**Figure S4.** ESI-HRMS of PIS upon addition of Cd<sup>2+</sup> in CH<sub>3</sub>CN

**Figure S5.** Cytotoxicity assays

**Figure S6.** <sup>1</sup>H NMR spectrum of sensor PIS

**Figure S7.** <sup>13</sup>C NMR spectrum of sensor PIS

**Figure S8.** Mass spectrum (ESI) of sensor PIS

---

\* Corresponding authors. Tel.: +86-351-7018842; fax: +86-351-7018842.

E-mail: wanghui@sxnu.edu.cn (H. Wang), wangyu1168@sxu.edu.cn (Y. Wang),

smshuang@sxu.edu.cn(S.M.Shuang ).

## Bio-imaging procedure

**Live-cell fluorescence imaging:** *Oxya chinensis* cells were grown at 37°C in Dulbecco's Modified Eagle Medium media (DMEM) supplemented with 10 % fetal bovine serum (FBS) under an atmosphere of 5% CO<sub>2</sub> and 95% air at 37 °C. For the imaging study, the cells were incubated first with 10 μM PIS for 20 min. After removal of excess PIS with PBS buffer, the cells were further treated with 20 μM Cd<sup>2+</sup> for another 10 min, respectively. Again, the cells were rinsed with PBS buffer to remove unbound Cd<sup>2+</sup> ions. After that the fluorescence images were collected using a 63×objective (excited at 405nm).

**Zebrafish fluorescence imaging:** Zebrafish (provided by School of Life Sciences, ShanXi University, China) were maintained in the facility according to the standard operational guidelines. Three-day-old larval zebrafish was pre-treated with probe PIS (10 μM) for 20min and then with 30μM Cd<sup>2+</sup> for another 10 min. After rinsing the zebrafish with PBS buffer to remove remaining PIS and unbound Cd<sup>2+</sup> ions, the fluorescence imaging was performed using a 5×objective (excited at 405nm).

**imaging of growing *Arabidopsis thaliana* root:** *Arabidopsis thaliana* plants were grown on Murashige–Skoog (MS) medium (containing vitamins and 1% sucrose) at 22°C under 16 h light/8 h dark conditions. All imaging experiments were performed using 5-day-old seedlings of *Arabidopsis thaliana* with a 63×objective (excited at 405nm). Before the imaging experiments, the whole seedlings were incubated first with 10 μM PIS for 15 min and then with Cd<sup>2+</sup> (30μM) for another 15 min.

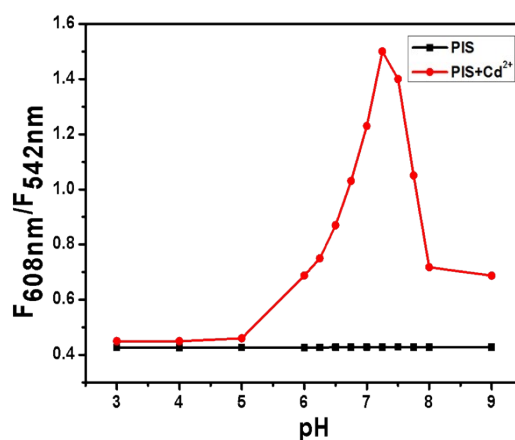

**Fig.S1.** pH-dependent fluorescence responses of PIS to Cd<sup>2+</sup> (7 equiv.) in CH<sub>3</sub>CN/H<sub>2</sub>O (4:1) solution.

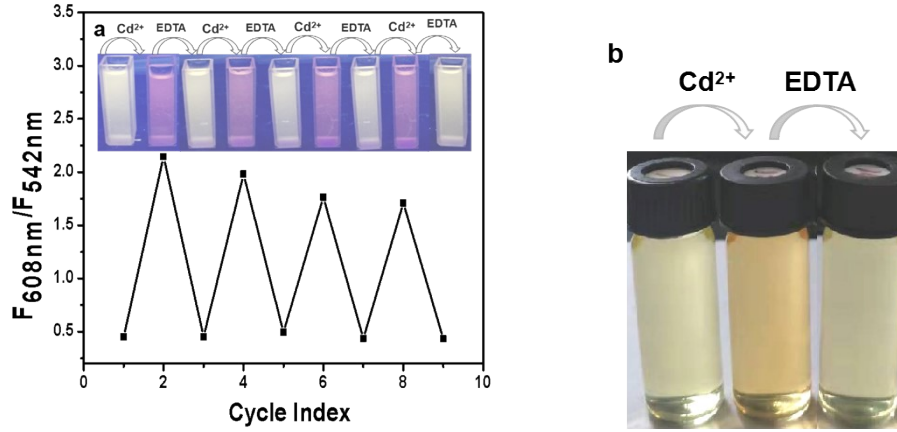

**Fig.S2.** Emission intensity changes and the accompanying color changes of PIS upon alternate addition of  $\text{Cd}^{2+}$  and EDTA.  $[\text{Cd}^{2+}] = 28 \mu\text{M}$ ,  $[\text{EDTA}] = 28 \mu\text{M}$ .

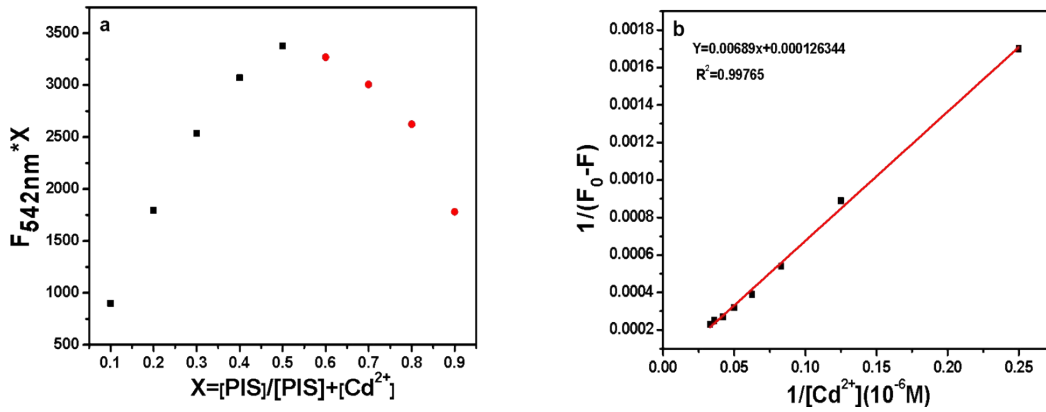

**Fig.S3.** (a) Job's plot for PIS and  $\text{Cd}^{2+}$  complexation in  $\text{CH}_3\text{CN}/\text{HEPES}$  buffer (pH 7.4, v/v, 4:1). The total concentration of PIS and  $\text{Cd}^{2+}$  is  $20 \mu\text{M}$ . (b) Benesi-Hildebrand plot.

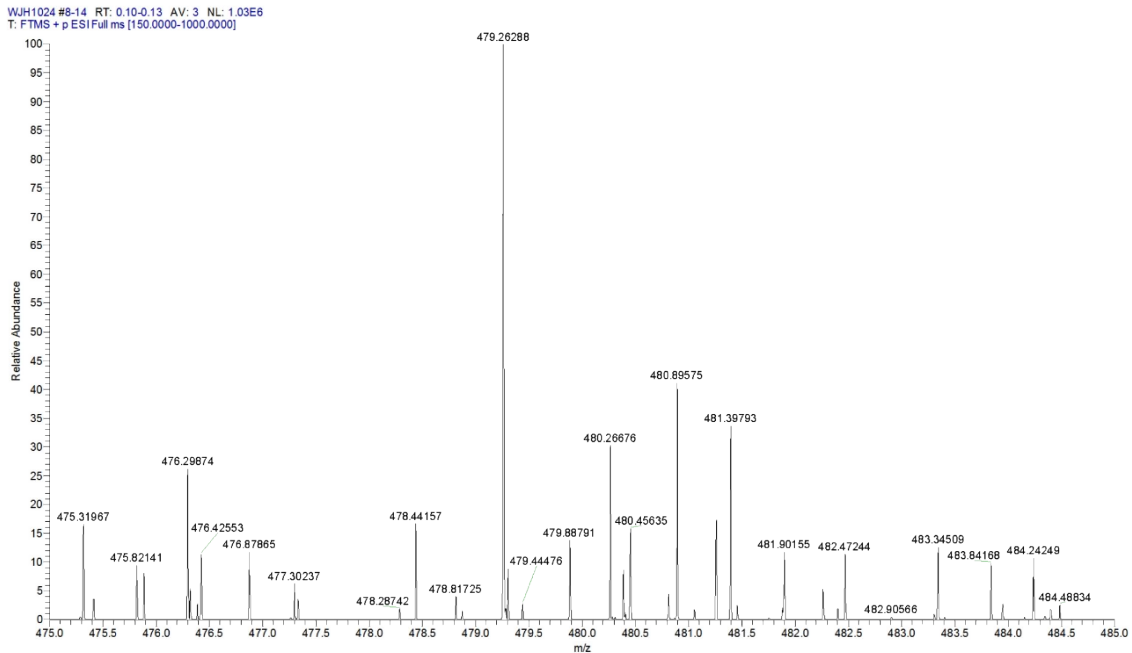

**Fig.S4.** ESI-HRMS of PIS upon addition of  $\text{Cd}^{2+}$  in  $\text{CH}_3\text{CN}$ .

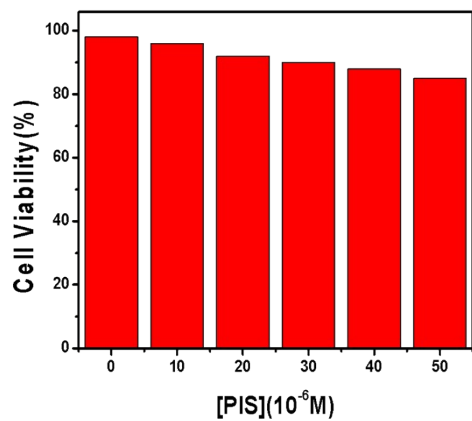

Fig.S5. Cell cytotoxic effect of PIS on SMMC-7721 cells.

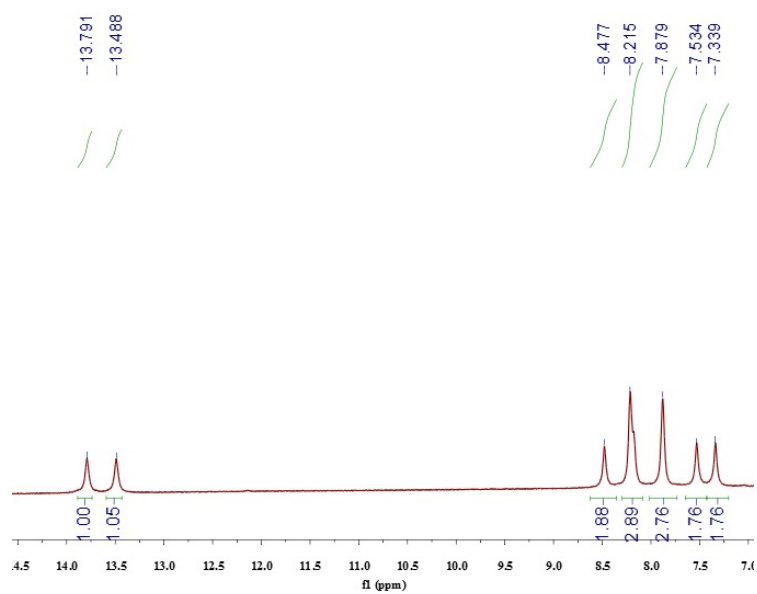

Fig.S6.  $^1\text{H}$  NMR spectrum of sensor PIS

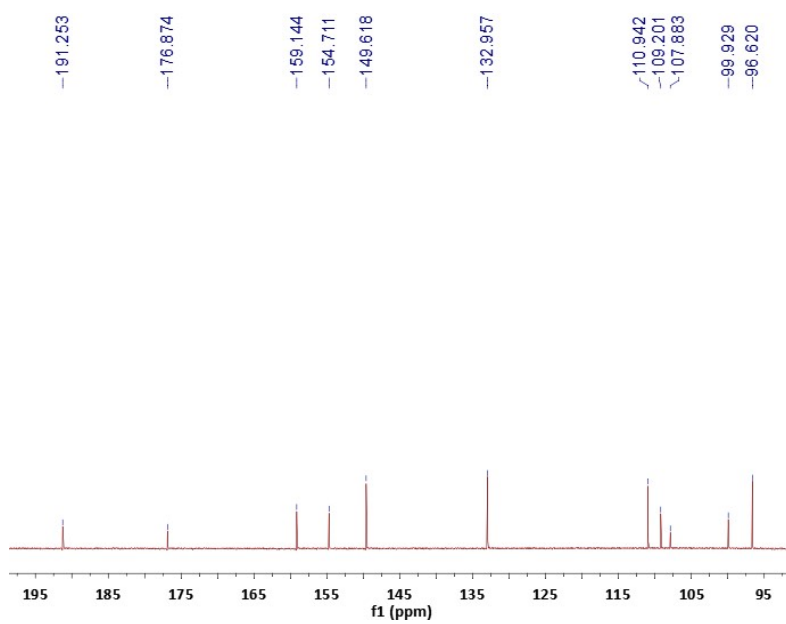

Fig.S7.  $^{13}\text{C}$  NMR spectrum of sensor PIS

WJH0510 #15-26 RT: 0.14-0.24 AV: 6 NL: 1.13E6  
T: FTMS + p ESI Full ms [150.0000-600.0000]

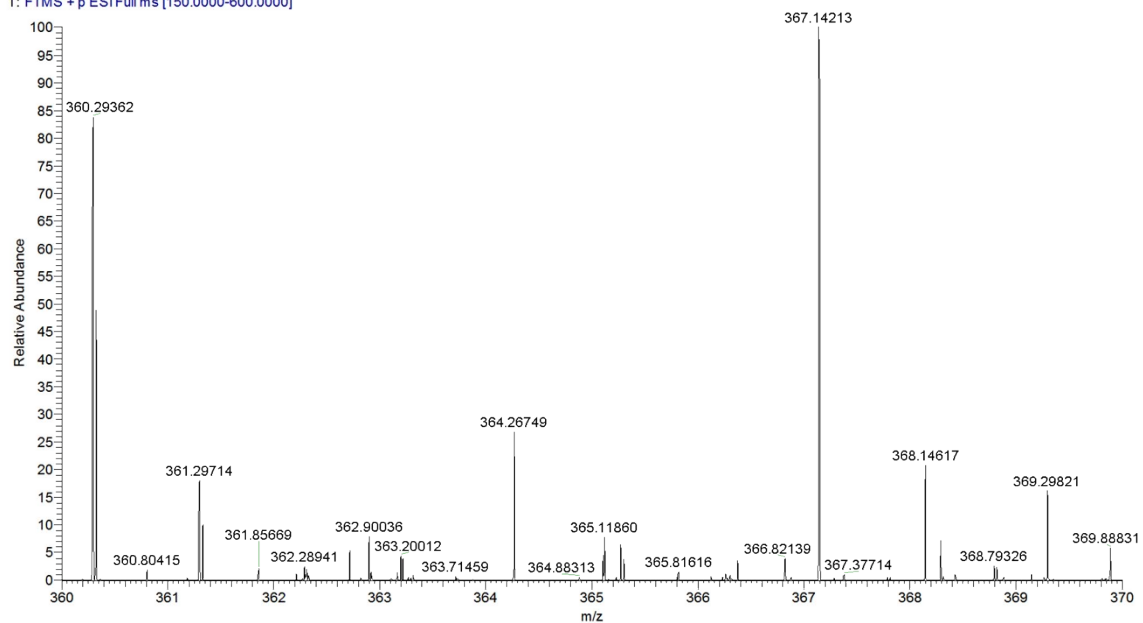

**Fig.S8.** Mass spectrum (ESI) of sensor PIS
